# Supplementary material
Source: Springer Nature journal article supplement (http://www.springermedizin.de/resource/supplementary/13049_2011_336_MOESM1_ESM.pdf/9666476)

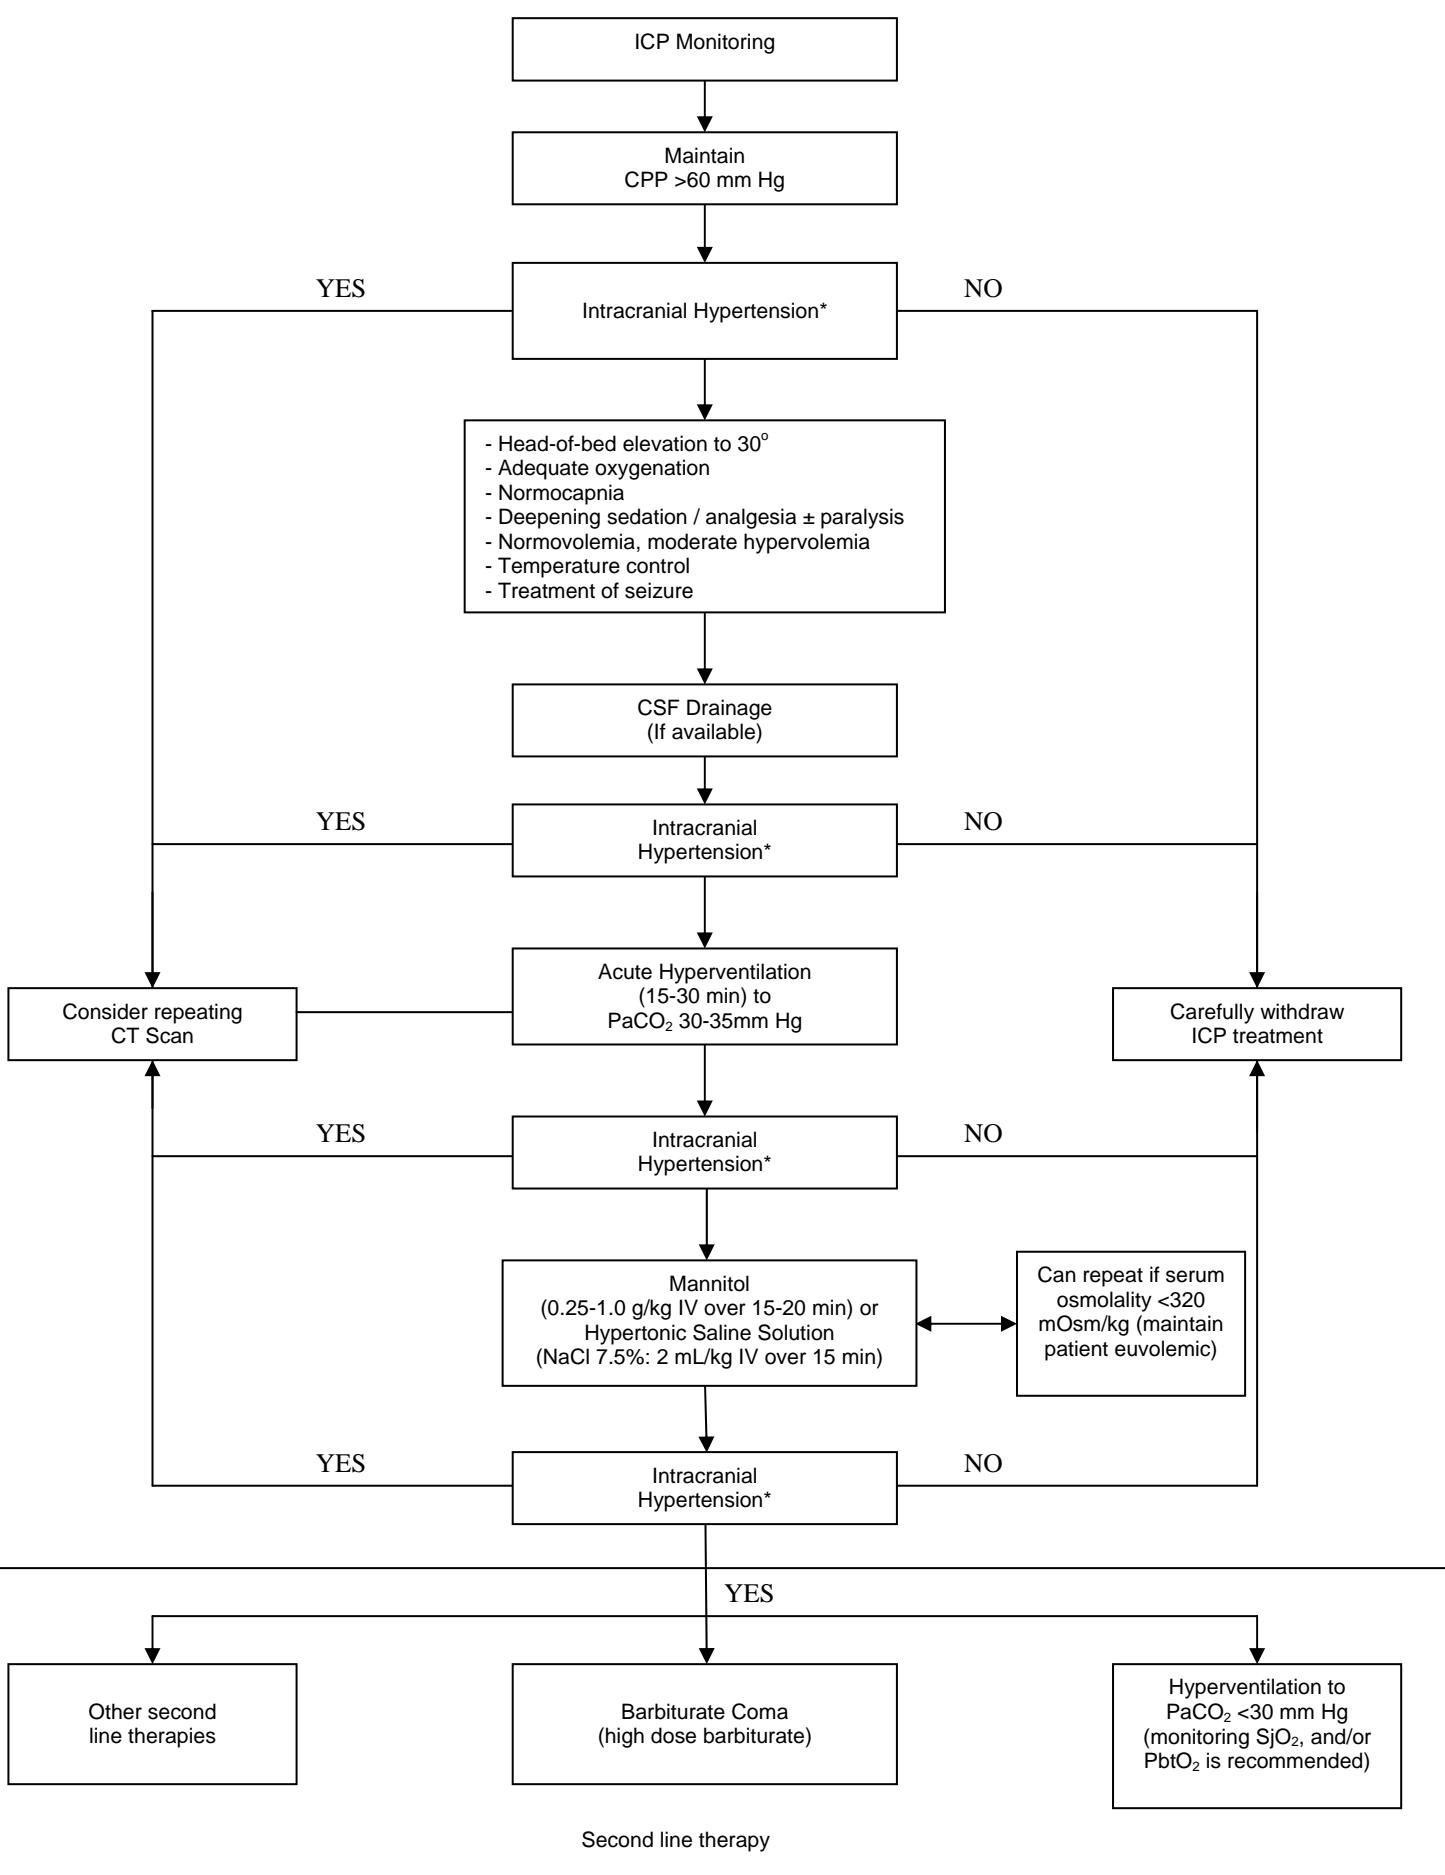

\* ICP of 20-25 mm Hg is used as the treatment threshold.

Supplement: MOESM1 [file 9666476]
